# Supplementary material for: A comprehensive spatio-cellular map of the human hypothalamus
Source: Springer Nature journal article supplement (doi:10.1038/s41586-024-08504-8), 2025-02-05
Supplement: MOESM1 [file 41586_2024_8504_MOESM1_ESM.pdf]

---

**Supplementary information**

---

# **A comprehensive spatio-cellular map of the human hypothalamus**

---

In the format provided by the  
authors and unedited

## **Supplementary Tables Guide (tables supplied separately)**

### **Supplementary Table 0: Dictionary**

Table and column legend for each of the subsequent tables.

### **Supplementary Table 1: Donor overview**

Donor information for Tadross et al. snRNAseq and spatial transcriptomics data and Siletti et al. snRNAseq data.

### **Supplementary Table 2: Sample overview**

Sample information and quality control statistics for snRNAseq data

### **Supplementary Table 3: Cell types for scvi evaluation metric**

Cell type signatures used to generate validation types for scvi tuning prior to final clustering

### **Supplementary Table 4: Scvi model tuning results**

Output of scIntegration pipeline containing sample mixing and cell type purity scores for different parameter combinations

### **Supplementary Table 5: Edgelist of hierarchical clustering tree**

Describing the relationship of all nodes (clusters on different levels) in the cluster tree

### **Supplementary Table 6: Annotations of hierarchical clustering tree**

Id and fully annotated name for clusters from all levels. Also includes top marker genes per cluster, as well as covariate(Dataset,Donor,Sample) distribution in each cluster.

### **Supplementary Table 7: Cluster marker genes (global)**

Up to top 100 significant marker genes of a cluster based on differential gene expression vs all other clusters (within the same C0 class). For example neuronal clusters are compared against other neuronal clusters. C0 markers are based on comparison against other C0 classes.

### **Supplementary Table 8: Cluster marker genes (Sibling)**

Up to top 100 significant marker genes of a cluster based on differential gene expression only vs other clusters with the same parent cluster (siblings).

### **Supplementary Table 9: Comparison with clustering results from Herb et al.**

Comparison of levels C2-H53, C3-H108, C4-H369 including the best corresponding cluster(s) from this study and the study by Herb et al.

### **Supplementary Table 10: Spatial atlas location of slices**

Identification of atlas location of each spatial transcriptomics section using the Paxinos Atlas of the Human Brain 4th Edition.

### **Supplementary Table 11: Mean region abundance C2/C3**

Mean abundance value (based on cell2location) of each C3 neuronal and C2 non-neuronal snRNAseq cluster in each spatial transcriptomics regional cluster.

**Supplementary Table 12: Region abundance assignment**

For all C2-C4 snRNAseq cluster clusters their assigned spatial region, based on the best matching spatial transcriptomics regional cluster(s) and associated statistics.

**Supplementary Table 13: Mean region abundance C4**

Mean abundance value (based on cell2location) of each C4 snRNAseq cluster in each spatial transcriptomics regional cluster.

**Supplementary Table 14: Human to mouse comparison**

Cross-species comparison table after final filtering with human C4 neuronal clusters and their matching mouse C465 (mouse HypoMap) neuronal clusters and their pearson correlation.

**Supplementary Table 15: Melanocortin cell types**

Cell type overview of human and mouse neuronal clusters expressing MC3R or MC4R including the average expression of receptors and selected marker genes.

**Supplementary Table 16: Incretin cell types**

Cell type overview of human and mouse neuronal clusters expressing GLP1R or GIPR including the average expression of receptors and selected marker genes.

**Supplementary Table 17: Magma results**

C4 cluster enrichment in the BMI GWAS signals.

**Supplementary Table 18: Effector Genes**

Effector genes based on the MAGMA gene associations derived from the BMI GWAS signals.

**Supplementary Table 19: Exome Signals**

Results of rare-variant burden tests towards BMI in the UK Biobank study.

**Supplementary Table 20: Regional abbreviations**

List of Regional abbreviations used in the study.
